# Supplementary material for: Non-orthogonal version of the arbitrary polygonal C-grid and a new diamond grid
Source: Copernicus journal article supplement (doi:10.5194/gmd-7-779-2014), 2014-05-09
Supplement: Supplementary file 1 [file supplement-cover-letter.pdf › supplement-cover-letter.pdf]

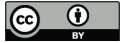

*Supplement of*

## **Non-orthogonal version of the arbitrary polygonal C-grid and a new diamond grid**

**H. Weller**

*Correspondence to:* H. Weller ([h.weller@reading.ac.uk](mailto:h.weller@reading.ac.uk))

- [Supplement-Cover-Letter.pdf](#)
- [home](#)
  - [hilary](#)
  - \* [OpenFOAM](#)
